# Supplementary material
Source: publisher site journal article supplement (https://www.dovepress.com/get_supplementary_file.php?f=351973.docx)
Supplement: Supplementary file 1 [file get_supplementary_file.php]

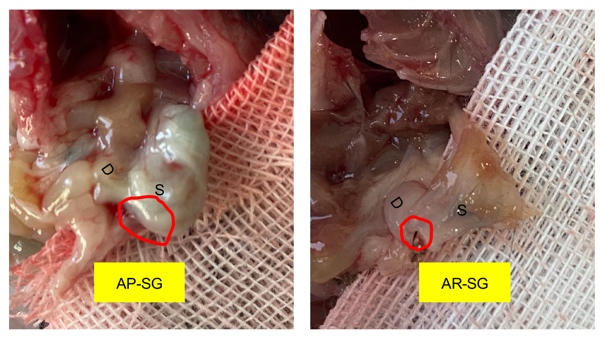


Figure S1. The size and confirmation of antrum (red circle) in AP-SG and AR-SG at the end of the study. D = duodenum; S = stomach.
